# Supplementary material
Source: HighWire-hosted journal article supplement (https://www.annfammed.org/highwire/filestream/8806/field_highwire_adjunct_files/0/ABFM.pdf)
Supplement: ABFM.pdf [file ABFM.pdf]

**Supplemental materials for:**

**American Board of Family Medicine. Improving performance improvement. *Ann Fam Med*. 2017;15(3)287.**

**Figure 1. Screen shot displaying example of available measures, “look and feel.”**

**PI Activity - Identify a Problem or Opportunity**

The first step in the performance improvement process involves identifying a problem or opportunity to address within your practice. You may already have something in mind to improve upon in your practice or you may need decide on what you want to work on. When deciding on something to work on review the available measures below to know whether or not you can measure the effects of the improvement you decide to implement.

Once you have decided your objective for improvement, you can choose below the measures you wish to monitor performance. You are required to select a minimum of one (1) measure from the below listed measures. For your convenience, you may select one measure group from the left and appropriate individual measures you wish to monitor in your performance improvement.

Once you have selected the measure you would like to include in your performance improvement, click the 'Next' button.

**SELECT MEASURE GROUP**

☐ MQS Domain  
☐ Disease Group  
☒ Custom  
☐ Individual

**LEGENDS**

☒ Measure Definition  
☐ Detailed Measure Definition

| MEASURE ID                              | MEASURE TITLE                                                                                     | MEASURE VERSION |
|-----------------------------------------|---------------------------------------------------------------------------------------------------|-----------------|
| <input type="checkbox"/> PRIME 12       | Pregnant Women that had HBsAg Testing                                                             | 2.0             |
| <input type="checkbox"/> PRIME 35       | Appropriate Testing for Children with Pharyngitis                                                 | 1.0             |
| <input type="checkbox"/> PRIME 36       | Controlling High Blood Pressure                                                                   | 1.0             |
| <input type="checkbox"/> PRIME 37-A     | Use of High-Risk Medications in the Elderly                                                       | 2.0             |
| <input type="checkbox"/> PRIME 37-B     | Use of High-Risk Medications in the Elderly                                                       | 2.0             |
| <input type="checkbox"/> PRIME 38-BHW-1 | Weight Assessment and Counseling for Nutrition and Physical Activity for Children and Adolescents | 1.0             |
| <input type="checkbox"/> PRIME 38-CN-1  | Weight Assessment and Counseling for Nutrition and Physical Activity for Children and Adolescents | 2.0             |
| <input type="checkbox"/> PRIME 38-PA-1  | Weight Assessment and Counseling for Nutrition and Physical Activity for Children and Adolescents | 1.0             |
| <input type="checkbox"/> PRIME 39       | Preventive Care and Screening: Tobacco Use: Screening and Cessation Intervention                  | 1.0             |
| <input type="checkbox"/> PRIME 38-BHW-2 | Weight Assessment and Counseling for Nutrition and Physical Activity for Children and Adolescents | 1.0             |
| <input type="checkbox"/> PRIME 38-CN-2  | Weight Assessment and Counseling for Nutrition and Physical Activity for Children and Adolescents | 1.0             |
| <input type="checkbox"/> PRIME 40       | Breast Cancer Screening                                                                           | 2.0             |

**Next**

**Figure 2. Screen shot showing example of quality improvement interventions organized by Chronic Care Model categories.**

You have already chosen below measures for improvement. You will now have to choose at least one CCM, Intervention, Resource and create an action plan for your activity

**LEGENDS**

☒ Chronic Care Model (CCM)  
☐ Interventions  
☐ Resources  
☐ Broken Link  
☐ Action Plan Steps

**Select Chronic Care Model**

PRIME 36 : Controlling High Blood Pressure

| CHRONIC CARE MODEL                                                   | DEFINITION                                                                                                                                                                                                                   |
|----------------------------------------------------------------------|------------------------------------------------------------------------------------------------------------------------------------------------------------------------------------------------------------------------------|
| <input type="checkbox"/> Category : Community Resources and Policies | Change concepts and interventions that utilize community resources to meet the needs of patients (NCQA Physician Practice Connections category-Patient Education and Support)                                                |
| <input checked="" type="checkbox"/> Health System                    | Change concepts and interventions that create a culture, organization, and mechanisms that promote safe, high-Performance healthcare                                                                                         |
| <b>Select Interventions</b>                                          |                                                                                                                                                                                                                              |
| <input type="checkbox"/> Physician Communication Aids                |                                                                                                                                                                                                                              |
| <input type="checkbox"/> Physician/Staff Education                   |                                                                                                                                                                                                                              |
| <input type="checkbox"/> Self-Management Support                     | Change concepts and interventions that empower and prepare patients to manage their health and health care (NCQA Physician Practice Connections category-Patient Education and Support)                                      |
| <input type="checkbox"/> Delivery System Design                      | Change concepts and interventions that assure the delivery of effective, efficient clinical care and self-management support (NCQA Physician Practice Connections category-Care Management)                                  |
| <input type="checkbox"/> Decision Support                            | Change concepts and interventions that promote clinical care consistent with scientific evidence and patient preferences (NCQA Physician Practice Connections category-Clinical Information Systems/Evidence-Based Medicine) |
| <input type="checkbox"/> Clinical Information Systems                | Change concepts and interventions that organize patient and population data to facilitate efficient and effective care (NCQA Physician Practice Connections category-Clinical Information Systems/Evidence-Based Medicine)   |

**Next**

re Model categories)
